# Supplementary material for: Impact of Diet Quality during Pregnancy on Gestational Weight Gain and Selected Adipokines—Results of a German Cross-Sectional Study
Source: MDPI journal article supplement (doi:10.3390/nu14071515), 2022-04-05
Supplement: s1 [file s1]

**Table S1.** Components of the HEI-NVS and their standards for scoring (modified from [1])

| Component                           | Max. points                       | Standard for max. point value <sup>1</sup> |
|-------------------------------------|-----------------------------------|--------------------------------------------|
| Fruits                              | 10 (5 additional points possible) | ≥ 250 g/day (2 servings)                   |
| Vegetables                          | 10 (5 additional points possible) | ≥ 400 g/day (3 servings)                   |
| Beverages                           | 10                                | ≥ 1.5 l/day                                |
| Grains, grain products, potatoes    | 10                                | 350-560 g/day                              |
| Milk, dairy products incl. cheese   | 10                                | 2 servings/day <sup>2</sup>                |
| Fish                                | 10                                | 150-220 g/week                             |
| Meat, meat products, processed meat | 10                                | < 300-600 g/week                           |
| Eggs                                | 10                                | ≤ 3 /week                                  |
| Alcohol                             | 10                                | ≤ 10 g ethanol/day (women <sup>3</sup> )   |
| Spreadable fats                     | 10                                | ≤ 15-30 g/day                              |

<sup>1</sup>based on a healthy adult with a physical activity level (PAL) of 1.4; <sup>2</sup>Portion sizes: 200-250 g milk/yoghurt or 50-60 g cheese/fresh cheese; <sup>3</sup> value for non-pregnant women

**Table S2.** Dietary intake of women following a “good quality” or “medium quality” diet (mean ± SD).

| Food category               | Recommended intake | Good quality diet (n=41) | Medium quality diet (n=69) | p-Value* |
|-----------------------------|--------------------|--------------------------|----------------------------|----------|
| Grains (g/day)              | 350-550            | 380.6 ± 125.5            | 367.0 ± 183.8              | 0.677    |
| Fruits (g/day)              | 250                | 408.5 ± 212.0            | 319.8 ± 226.0              | 0.044    |
| Vegetables (g/day)          | 400                | 995.1 ± 344.9            | 645.7 ± 485.8              | ≤0.001   |
| Milk/milk products (g/day)  | 100-500            | 664.6 ± 341.4            | 879.7 ± 531.0              | 0.022    |
| Meat/meat products (g/week) | <300-500           | 876.1 ± 507.5            | 976.2 ± 487.0              | 0.307    |
| Thereof, red meat (g/week)  |                    | 602.2 ± 486.6            | 970.9 ± 716.1              | 0.004    |
| Eggs (number/week)          | <3                 | 2.0 ± 1.0                | 2.1 ± 1.6                  | 0.751    |
| Fish (g/week)               | 150-220            | 230.5 ± 157.7            | 232.6 ± 312.5              | 0.968    |
| Spreadable fats (g/day)     | <15-30             | 21.8 ± 18.1              | 39.8 ± 31.7                | 0.001    |
| Beverages (ml/week)         | >1,500 ml          | 2,931.7 ± 1,112.3        | 2,936.2 ± 1,299.3          | 0.986    |

\*T-test for 2-group comparisons,  $p \leq 0.05$  was defined as level of significance

**Table S3.** Comparison of the Healthy Eating Index (HEI, total and subcategories) by GWG groups (mean ± SD)

| Food category          | Low-GWG (n=16) | Normal-GWG (n=40) | High-GWG (n=53)         | p-Value*     |
|------------------------|----------------|-------------------|-------------------------|--------------|
| HEI, total             | 81.3 ± 11.6    | 82.1 ± 10.9       | 85.1 ± 11.9             | 0.412        |
| HEI grains             | 8.2 ± 1.9      | 8.3 ± 1.9         | 8.6 ± 1.8               | 0.140        |
| HEI milk/milk products | 5.4 ± 2.2      | 5.3 ± 2.8         | 5.0 ± 2.6               | 0.452        |
| HEI fruits             | 11.5 ± 4.2     | 10.0 ± 4.5        | 12.1 ± 3.6 <sup>a</sup> | 0.420        |
| HEI vegetables         | 12.0 ± 4.0     | 11.9 ± 4.3        | 12.7 ± 3.5              | 0.792        |
| HEI fish               | 3.9 ± 4.0      | 5.2 ± 3.8         | 5.2 ± 4.3               | 0.465        |
| HEI meat/meat products | 7.0 ± 2.1      | 6.7 ± 2.5         | 7.2 ± 2.4               | 0.086        |
| HEI eggs               | 9.3 ± 1.4      | 9.4 ± 1.4         | 9.5 ± 1.1               | 0.878        |
| HEI alcohol            | 10.0 ± 0.0     | 10.0 ± 0.0        | 10.0 ± 0.0              | <sup>b</sup> |
| HEI spreadable fats    | 7.8 ± 2.9      | 8.3 ± 2.6         | 8.4 ± 2.2               | 0.533        |
| HEI beverages          | 10.0 ± 0.0     | 10.0 ± 0.2        | 9.8 ± 1.2               | 0.825        |

\*Chi<sup>2</sup> test for intergroup comparisons;  $p \leq 0.05$  was defined as level of significance

<sup>a</sup>  $p = 0.015$  vs Normal-GWG (t-test for 2-groups comparison); <sup>b</sup> could not be calculated (constant variable); Legend: BMI, Body Mass Index; GWG, gestational weight gain

**Table S4.** Comparison of the Healthy Eating Index (HEI, total and subcategories) by pre-pregnancy BMI class (mean  $\pm$  SD)

| Food category          | BMI < 30 kg/m <sup>2</sup> (n=93) | BMI $\geq$ 30 kg/m <sup>2</sup> (n=17) | p-Value*     |
|------------------------|-----------------------------------|----------------------------------------|--------------|
| HEI, total             | 84.5 $\pm$ 11.3                   | 77.8 $\pm$ 11.5                        | 0.027        |
| HEI grains             | 8.36 $\pm$ 1.9                    | 8.6 $\pm$ 2.0                          | 0.597        |
| HEI milk/milk products | 5.3 $\pm$ 2.7                     | 4.3 $\pm$ 1.7                          | 0.136        |
| HEI fruits             | 11.5 $\pm$ 3.9                    | 9.6 $\pm$ 5.0                          | 0.068        |
| HEI vegetables         | 12.3 $\pm$ 3.9                    | 12.4 $\pm$ 4.1                         | 0.973        |
| HEI fish               | 5.4 $\pm$ 4.1                     | 2.9 $\pm$ 3.4                          | 0.020        |
| HEI meat/meat products | 7.07 $\pm$ 2.4                    | 6.4 $\pm$ 2.4                          | 0.290        |
| HEI eggs               | 9.4 $\pm$ 1.2                     | 9.5 $\pm$ 1.4                          | 0.826        |
| HEI alcohol            | 10.0 $\pm$ 0.0                    | 10.0 $\pm$ 0.0                         | <sup>a</sup> |
| HEI spreadable fats    | 8.3 $\pm$ 2.3                     | 8.2 $\pm$ 3.03                         | 0.888        |
| HEI beverages          | 10.0 $\pm$ 0.2                    | 9.4 $\pm$ 2.1                          | 0.009        |

\*t-test for 2-groups comparisons,  $p \leq 0.05$  was defined as level of significance; <sup>a</sup> could not be calculated, as the SDs of both groups were equal; Legend: BMI, Body Mass Index

**Table S5.** Comparison of the Healthy Eating Index (HEI, total and subcategories) by age group (mean  $\pm$  SD)

| Food category          | Age: 18-34.9 years (n=64) | Age $\geq$ 35 years (n=46) | p-Value*     |
|------------------------|---------------------------|----------------------------|--------------|
| HEI, total             | 80.7 $\pm$ 11.5           | 87.3 $\pm$ 10.5            | 0.002        |
| HEI grains             | 8.4 $\pm$ 2.0             | 8.5 $\pm$ 1.7              | 0.754        |
| HEI milk/milk products | 4.8 $\pm$ 2.8             | 5.6 $\pm$ 2.2              | 0.129        |
| HEI fruits             | 10.9 $\pm$ 4.5            | 11.7 $\pm$ 3.5             | 0.324        |
| HEI vegetables         | 11.4 $\pm$ 4.4            | 13.6 $\pm$ 2.7             | 0.004        |
| HEI fish               | 4.8 $\pm$ 4.1             | 5.3 $\pm$ 3.9              | 0.498        |
| HEI meat/meat products | 7.0 $\pm$ 2.5             | 7.0 $\pm$ 2.2              | 0.915        |
| HEI eggs               | 9.4 $\pm$ 1.4             | 9.5 $\pm$ 1.0              | 0.480        |
| HEI alcohol            | 10.0 $\pm$ 0.0            | 10.0 $\pm$ 0.0             | <sup>a</sup> |
| HEI spreadable fats    | 8.1 $\pm$ 2.6             | 8.6 $\pm$ 2.2              | 0.263        |
| HEI beverages          | 9.8 $\pm$ 1.1             | 10.0 $\pm$ 0.2             | 0.437        |

\*t-test for 2-groups comparison,  $p \leq 0.05$  was defined as level of significance; <sup>a</sup> could not be calculated, as the SDs of both groups were equal

## REFERENCES

1. Hoffmann, I.; Spiller, A.; (Hrsg.). Auswertung der Daten der Nationalen Verzehrsstudie II (NVS II): eine integrierte verhaltens- und lebensstilbasierte Analyse des Bio-Konsums. [https://orgprints.org/id/eprint/18055/1/18055-08OE056\\_08OE069-MRI\\_uni-goettingen-hoffmann\\_spiller-2010-verzehrsstudie.pdf](https://orgprints.org/id/eprint/18055/1/18055-08OE056_08OE069-MRI_uni-goettingen-hoffmann_spiller-2010-verzehrsstudie.pdf) (Accessed October 2, 2021).
